# Supplementary material
Source: PubMed Central journal article supplement (PMC2613746)
Supplement: pp.108.126714_1.pdf [file pp.108.126714_1.pdf]

OsATG3a 1 MQVKQKVYELFKGTVERVTGPRTVSAFLDKGVLSVPEFLLAGDNLVSKCPTWSWEAGDP-SKRKPYLPDPKQFLVTRNVP  
ZmATG3 1 MQVKQKVYEFYKGTVERVTAPRTVSAFLEKGVLSVPEFLLAGDNLVAKCPTWSWEAGDP-SKRKPYLPANKQFLVTRNVP  
AtATG3 1 MVLSQKLEHFAFKGTVERITGPRTISAFKEKGVLSVSEFVLAGDNLVSKCPTWSWESGDA-SKRKPYLPSPDKQFLITRNVP  
ScATG3 1 -----MIRSTLSSWREYLTPITHKSTFLTTGQITPEEFVQAGDYLCMHMFTWKWNESSDISYRDFLPKNKQFLIIRKVP

OsATG3a 80 CLRRRAVSLSEFYDAAGAEEVVLGDDDEGEGWLATHGVQASKQEEEDIPSMDTLDIGKTEGIKSIPSYFSA GKKAEEFEEDI  
ZmATG3 80 CLRRRAISVEEYDAAGAEEVVL--DEDGEGWLATHGVQASKTEEEEDIPSMDTLDIGRSDGIKSIPSYFSGGK-DEEEEDI  
AtATG3 80 CLRRRAASVADYEAAGGEVLVD-DEDNDGWLATHGKPKDKGKEEDNLPMDALDINEKNTIQSIPTYFG-----EEDDDI  
ScATG3 76 CDKRAEQCVVEVEGPDVIMKGFADGDDEDDVLEYIG---SETEHVQSTPAGGTKDSIDD-----IDELI

OsATG3a 160 PDMDTYEDSGN---DSVATAQPSYFVAEPEDDNILRTRTYDVSITYDKYYQTPRVWLTGYDESRLMPLKPELVFEDISQD  
ZmATG3 157 PDMDTYEDTG---DNLAAAEPSYFIAEPEDDNILEHTRTYDVSITYDKYYQTPRVWLTGYDESRLMPLPELVFEDISQD  
AtATG3 155 PDMEEFDEADNVVENDPATLQSTYLVVAHEPDDNILRTRTYDVSITYDKYYQTPRVWLTGYDESRLMLOPELVMEDVSQD  
ScATG3 137 QDMEIKEEDEN-----DDTEEFNAKGGGLAKDMAQERYDYDLYLAYSTSYRVPKMYIVGFNSNGSPLSPEQMFEDISAD

OsATG3a 237 HARKTVTIEDHPHLSA-GKHASVHPCKHAAMVKKIIDVLMRQGVPEP-----EVDKYL F  
ZmATG3 233 HARKTVTIEDHPHLA-GKHASVHPCKHAAMVKKIIDVPMRQGVPEP-----EVDKYL F  
AtATG3 235 HARKTVTIEDHPHLP--GKHASVHPCKHCAVMKKIIDVLMRQGVPEP-----EVDKYL F  
ScATG3 209 YRTKTAATIEKLEFFYKNSVLSVSIHPCKHANVMKILLDKVRVVRQRRRRELQEEQELDGVGDWEDLQDDIDDSL RVDQYLI

OsATG3a 289 IFLKFMASVIPTIEYDYTMDFDLGSTSR  
ZmATG3 285 IFLKFIATVIPTIEYDYTMDFDLGSTS-  
AtATG3 286 IFLKFMASVIPTIEYDYTMDFDLGSSST  
ScATG3 289 VFLKFIITSVTPSIQHDTMEGW-----

AtATG4a 1 MKALCDRFVFPQQCSSSSKSDT-----HDKSP---LVSDSGPSDNKSKFTLWSNVFTSSSSSVSQPYRESSSTSG---  
AtATG4b 1 MKAICDRFVFPKCSSSSTSEK-----RDISSPTSLVSDSASSDNKSNLTLCSDVVASSSPVSQLCREASTSG---  
ZmATG4a 1 MTSLPERGESP-VPPLDLSLRQDSAVTVLAAAAVASSAGSDRKEEDSGSRQPKASTLSGVFSPFFAIFEGQQGSSSPACD  
ZmATG4b 1 MTTSPERGEAPPAPRDSPCEDAAP---AAAVVASSSSGSEEREEDGGSROPKASVLSGVFAPPLAIFEGQQQVSTP-CD  
OsATG4a 1 MTSLPGRGVSP--SSSDPLCE-----GNAAPSSSSSSGQD---LKQLKNSLTLSCVFSSPFSIFEAHQDSSANR---  
OsATG4b 1 MTSLPGDRGVSS--SSSDPLCE-----GNIAPCSSSSSEQKEDCSLKQSKTSLTLSCVFNSPFPNIFEAHQDSSANK---  
ScATG4 1 MQRWLQLWKMDLVQKVSHGVFE-----GSSEEPAAALMNHDIYVILGEVYPERDEESGABQCEQDCR---

AtATG4a 65 --HKQVCTTRNGWTAFAVKRVSMAAGAIRRFQERVLGPNRTGLPSTTSDVWLLGVCYKISADEN---SGETDTGTVLAALQ  
AtATG4b 68 --HNPVCTHSSWTVILKTASMAAGAIRRFQDRVLGPRTGISSTSEIWLGVCYKISEGES---SEADAGRVLAAFR  
ZmATG4a 80 ARSTKSSSGSYGLSRILRRF-VGSGSMWRLLG-----CGRVLTSSDVWFLGKCYKVSPEEEEE--SGDSESDSGHAAFL  
ZmATG4b 77 ASSTKPPSGSYAWSRILRRF-VGSGSMWRLLG-----CARVLTSGDVWFLGKCYRVSPEEEEE--SGGSDSDSGHAAFL  
OsATG4a 64 --SLKPHSGSYAWSRFLRRI-ACTGSMWRFLG-----ASKALTSDDVWFLGKCYKLSSEEL---SNSSDCESGNAAF  
OsATG4b 67 --SPKSSSGSYDWSRVLLRI-VGSGSMWRFLG-----TSKVLTSDDVWFLGKCYKLSSEES---SSDSDSESGHATFL  
ScATG4 61 -----YRGEAVSDGFLSSFLG-----REISSYTKFELLDVQSRVNFYTRTRFVPIARAPDCPSPLS

AtATG4a 140 LDFSSKILMTYRKGFEPFRDITTYTSDVNWGCMIRSSQMLFAQALLFHRLGRATKK-SELPEQEVLETLEPFQDSEPSAF  
AtATG4b 143 QDFSSILMTYRGRGFEPIDITTYTSDVNWGCMLRSGQMLFAQALLFQRLGRSWRKKDSEPADEKYLELEIFQDTEASAF  
ZmATG4a 150 EDFSSRIWITYRKGFDAISDSKLTSDVNWGCIVRSSQMLVAQALIFHHLGRSWRKPPEKPYNDYIGVHLHFGDSEACAF  
ZmATG4b 147 EDFSSRIWITYRKGFDAIPGSKLTSDVNWGCIVRSSQMLVAQALIFHHLGRSWRKPPEKPYDPIYIRVHLHFGDSEACAF  
OsATG4a 131 EDFSSRIWITYRKGFDAISDSKYTSDVNWGCIVRSSQMLVAQALIFHHLGRSWRKPPEKPYSPYIIGLHMFQDSEACAF  
OsATG4b 134 EDFSSRIWITYRGFDAISDSKYTSDVNWGCIVRSSQMLVAQALIFHHLGRSWRPELEKPYNPEYIIGLHMFQDSEACAF  
ScATG4 117 LNLVLRNPNPSTIEDYIANPDCFNTEIGWGCMIIRIGQSLIGNALQILHLGRDFRVNGNESLERE-SKFVNWFENDTPEAFP

AtATG4a 219 SIHNLIIAGASYG-LAAGSWVGPYACRAWESLACKKRKQTDTSK--NQTLPMAVHIVSGSEDEGERGGAPILCIEDATKSC  
AtATG4b 223 SIHNLIIAGASYG-LAAGSWVGPYACRSWESLARKNKEETDDK--HKSFSMAVHIVSGSEDEGERGGAPILCIEDVTKTC  
ZmATG4a 230 SIHNLIIAGASYG-LAAGSWVGPYACRAWQTLIRTNREQADAVDGKENFPMALYVVSDEDEGERGGAPVVICIDVAAQLC  
ZmATG4b 227 SIHNLIIAGASYG-LAAGSWVGPYACRAWQTLIRTNREQADAVDGKENFPMALYVVSDEDEGERGGAPVVICIDVAAQLC  
OsATG4a 211 SIHNLIIAGASYG-LAAGSWVGPYACRAWQTLVCTNREHHEAVDGNFPMALYVVSDEDEGERGGAPVVICIDVAAQLC  
OsATG4b 214 SIHNLIIAGASYG-LAAGSWVGPYACRAWQTLVIRTNREHHEAVDGNESFPMALYVVSDEDEGERGGAPVVICIDVAAQLC  
ScATG4 196 SLHNFVSACTELSDKRPGEWFGPAAATARSIQSLIYG-----FPECGIDDCITVSVSSGD-----IYENEVEKVF

AtATG4a 296 LEFSKQGESEWTFPIILLVPLVLGLDSVNPRIYPSLIVATFFFPQSVGILGGKPGASTYIVGVQEDKGFYLDPEHVOQVVTVN  
AtATG4b 300 LEFSEGETEWFPIILLVPLVLGLDRVNPRIYPSLIATFFFPQSLGILGGKPGASTYIVGVQEDKGFYLDPHDVOQVVTVK  
ZmATG4a 309 SDFNKGQSTWSPILLVPLVLGLDKINPRIYPLPKETFFFPQSLGILGGKPGTSTYIAGVQDDRALYLDPEHVMQVAVDIA  
ZmATG4b 306 SFNKGQSTWSPILLVPLVLGLDKINPRIYPLPKETFFFPQSLGILGGKPGTSTYIAGVQDDRALYLDPHDVMQVAVDIA  
OsATG4a 290 CDFNKNQSTWSPILLVPLVLGLDKINPRIYPLPKETFFFPQSLGILGGKPGTSTYIAGVQDDRALYLDPEHVMQVAVDIA  
OsATG4b 293 CDFNKGQSTWSPILLVPLVLGLDKINPRIYPLPKETFFFPQSLGILGGKPGTSTYIAGVQDDRALYLDPEHVMQVAVDIA  
ScATG4 259 AENPN-----SRILFLLVGLVGLGINAVNESYRESICGILSSTQSVGIAGGRPSSSLYFFGQYGNFELHFDPHIPQPAVEDS

AtATG4a 376 KETPDVDTSSYHCNVLRYVPLESLDPSLALGFYCRDKDDFDDFCIRATKLAE-----SNGAPLFTVTOHT-----  
AtATG4b 380 KENQDVDTSSYHCNLTLYVPLESLDPSLALGFYCRDKDDFDDFCIRATKLAGD-----SNGAPLFTVTOHRR-----  
ZmATG4a 389 LDNLEADTSSYHCSVVRALALEQIDPSLAIGFYCRDKDDFDDFCRSASELAEK---ANGAPLFTVQSVQPSKOMYKQ--  
ZmATG4b 386 PDNLEADTSSYHCSVVRDLALEQIDPSLAIGFYCRDKDDFDDFCRSASELAEK---ANGAPLFTVQSVQPSKOMYKQ--  
OsATG4a 370 ADNLEADTSSYHCSTVRDLALDIDPSLAIGFYCRDKDDFDDFCRSASELVK---ANGAPLFTVQSVQPSKOMYNE--  
OsATG4b 373 ADNLEADTSSYHCSTVRDLALDIDPSLAIGFYCRDKDDFDDFCRSATELVK---ANGAPLFTVQSVQPSKOMYNQ--  
ScATG4 334 -----FVESCHTSKFGKQLQSEMPSMLIGILIKGEKDWQWKLEVAESAIINVLAKRMDDFDVSCSMDDVESVSSNSM

AtATG4a 443 -----AINQSNYGFAD---DSEDEREDDWQML-----  
AtATG4b 448 -----NDCGIAETSSSTETST---EISGEEHEDDWQL-----  
ZmATG4a 464 -----DDGLG-CSGSSMANDD-DLDGSGEA--EEWQIL-----  
ZmATG4b 461 -----DDGLCCSGSSMANEDYLDASGEA--EEWQIL-----  
OsATG4a 445 -----ESSSGD-GMDSINVEG--LDGSGETGEEWQIL-----  
OsATG4b 448 -----DVLGISGDGNINVED--LDASGETGEEWQIL-----  
ScATG4 408 KKDASNENLGVLEGDYVDIGAIFPHTTNTEDVDEYDFQDIHCKKQKIVVMGNHTHTVNANLTDYEVEGVLEKETVGIH

AtATG4a -----  
AtATG4b -----  
ZmATG4a -----  
ZmATG4b -----  
OsATG4a -----  
OsATG4b -----  
ScATG4 488 SPIDEKC

OsATG5 1 MAAQRDDEACWSAEAAARRVWGAVPLQVHLHDADVTTLPPP--PPFLTGLPRIGYLP LLVPIIKAHFS-----STLPPGI  
 ZmATG5 1 MAAPHDEAAAWAEAAARRVWAGAVPLQVHLHDADVTALPPP--PPFLTGLPRIGYLP LLIPVIRAHFS-----NALPPGV  
 AtATG5 1 -----MAKEAVKYVWEGATPLQHLHKSDVASHAPAP--PPALVLA PRIGYLP LLIP LIKPYFK-----DSLPPGE  
 ScATG5 1 -----MNDIKQLLWNGELNVLVLSIDPSFLMKGS PREIAVLRIRVPRETYLVNYMPLIWNKIKSFLSFDPLTDSE

OsATG5 74 DTVWFEYKGLPLKWIPIGVLVYDLLCADPERPWN-----LTVHFRG--YPSEILTLCDGEDSVKWSYMNSLK  
 ZmATG5 74 DTVWFEYKGLPLKWIPIGVLFDLLCADPERPWN-----LIVHFRG--YPSEILSPCEGEDSVKWSYMNSLK  
 AtATG5 64 DSIWFDYKGFPLKWIPTGVLFDLLCAEPPERPWN-----LTIHFRG--YPCNILIPCEGEDSVKWNFVNSLK  
 ScATG5 70 KYFWFEHNKTPFPWNYPVGVLFDCLAGKSATFTTSFENQVKDVLTFLRILHLMGDSLPTLTIPIASSKTQAEKFWFHQWK

OsATG5 139 EAAFIIITGNSKNVMNMSQADQALWQSVMKGNLDGYMNISTRKLG-PFEEDCLVRTSSVEGO--QGSDEPESPGSGKPC  
 ZmATG5 139 EATFIIITGNSKSVMNMSHADQVALWESVMKGNLDGYKNISTRKLG-PFEDDLVRTASVERQRQONSDEPESPGSSKPC  
 AtATG5 129 EAQYIINGNCKNVNMSQSDQEDLWTSVMNGDLDAVTRLSPKLKMGTVEDEFSRKTSLSSPQSQQVVPETEVAGQVKTA  
 ScATG5 150 QVCFILNGSSKATMSLSVNEARKFWGSVITRNFDIEFISNKISSRPRHIPLIIQTSRTSGTFRISQPTISMTG-----

OsATG5 216 RVPVRLYVRSVQEDLYDLEDALPVGDWESISYINRPFVRRFEGRSYITLEHALKTLLEFFSSKASRIPDDSETAPOAP  
 ZmATG5 218 RVPVRLYVRNVQEDLEYIEHAVPVS DWENVSYINRPFETRKAEGRSYITLEHALQTLLEFFSSKPPGSADGSOHAG-AM  
 AtATG5 208 RVPVRLYVRSLNKDFENLEDVPELDTWDDISYLNRPVFLKEEGK-CFTLRDAIKSLLPEFMG-----DRAQTSG---  
 ScATG5 225 ---VNPTLKDIEGDILLDVKEGING---NDVMVTCQGIETIP-----WHMLLYDLYSKLRSFDG-----

OsATG5 296 DSAPNDDSDVTPRSCEKLESSASSSPQEANVANKGKIVKLVVVOGIEVDM DIPFLWVANNLKNPECYLHICVYVGTRE  
 ZmATG5 297 DAAADSSDATNSSRSQEAEOALASPAEAGSAKRAK-VKLVVVOGVELDMDIPFLWVADHLKNPEYVYHICVYVGTRE  
 AtATG5 277 -----EERSIDDEADGSREMGEIKLVRIQGIEMKLEIPFSWVNNLMNPEFYLHISVLDVKAPQR-  
 ScATG5 276 -----FLYITLVPIKGGDKASSEL-----

OsATG5 376 PKDGR  
 ZmATG5 -----  
 AtATG5 -----  
 ScATG5 -----

OsATG7 1 MAARAEAAAAAARPLQAAAAGVCAETGFWDALRRRLKLDVLGTDDSPIITGYTTPROYEKIASLFRICPESILIPP-----  
ZmATG7 1 MAG--AGAMGFPRELMVQRIQSLVEEGFWDALRRRHKLVDLGTDDSPIITGYTTPRORRPMASFFNLRSGSLVPP-----  
AtATG7 1 ----MAEKETPAIILQFAPLNSVDEGEFWSFSLSKLDKLGTTDDSPIITGYTTPRORRPMASFFNLRSGSLVPP-----  
ScATG7 1 -----MSSERVLSTYAPAFKSFLDTSFQELSRRLKLDVLKLDSTCOPLTVNLDLHNIPKASADQVPLFLTRNSFE-----

OsATG7 76 SANSFGDRNNCPVPGTLLNTNNMRGFONLDRALLLKAEEKILHDIKSGKVEENPALLRFLVVISFADLKNWVYVNVAF  
ZmATG7 74 SHSSVGDNRNCPVPGTLLNTNNMRGFENLDREQLLKAEEKILHDIKSGKVEEDPSVLLRFLVVISFADLKNWVYVNVAF  
AtATG7 77 ASTSHGNRNKCPVPGTLLNTNTVSEFNKLDKQSLKAEANKIWDIISGKALEDPVLPFRFLVVISFADLKNWVYVNVAF  
ScATG7 69 -KHNNKRTRNEVPELQSGSIFNFVNLDEKFLDKQLFLHQRALCEWEDG-----IKDINKCVSEFVVISFADLKNWVYVNVAF

OsATG7 156 PSLIFDSKITLLSLKLASQVLKQEEATSLSNAFTEWRKSESETTVVPPFLINISPDSSATITROLKDWKACQNGOKLLFGF  
ZmATG7 154 PSLVFNRSRITLLSLQPAKVLTKEEAASMYTSLQKWRFSSETTVIPFFLVSISSDSSASIRQLKEWKACQNGYOKLLFGF  
AtATG7 157 PAFVLDPPVSLTELKPASEYFSSFEAESVSAACNDWRDSDLTTDVPFFLVSVSSDSKASIRHLKDLKLEACQGDHOKLLFGF  
ScATG7 143 PCFQ-----RPSSTVHLVHRPEPFLKGLFESKCKQKWFVDVNYSKWVCILDADD-----EIVNYDKCITIRKTKVLA-I

OsATG7 236 YDHGNR-GFPGWALRNYIAFVSLRW-KIEKVHFFCYREKRGFPIQOSLVGEASFPAPHAGWDEFPDYVPEATGWEGETAG  
ZmATG7 234 YDHGCRSDCPGWVLRNYVAFSLRW-KIEKAQIFCYREYKGNPDLEQSLIGEASFPSPYG-WDNPEFLPDAIGWEGVKPG  
AtATG7 237 YDPCHLPSNPGWPLRNYLALIRSW-NLETVWFFCYRESRGFADLNLVSLVGOASITLSSG--ESAETVNSVWGWELNK-G  
ScATG7 206 RDTSTMENVEPSALTKNFLSVLQYDVPDLIDFKLLIIRQNEGSAFNATFASIDPQSSSN---PDMK--VSGWERNVQG

OsATG7 314 KESKEMKPKKIDLS-SINPASQDEEKQLMHLKLMGWRHFP-VNLDKLAGVRCLLGAGTLGCEVARLLMTWGVKLTIVVD  
ZmATG7 312 KGTKEMKPKKIDIQ-SMNPASQDEEKQLMHLKLMGWRHFP-VNIDRLSHVRVLLGAGTLGCEVARLLMTWGVKLTIVVD  
AtATG7 313 KR----VPRSTSLANSMDPTRLAVSAVDLNLKLMRWRALPSLNLNLVSSVKCLLGGAGTLGCEVARLLMTWGVKLTIVVD  
ScATG7 280 KL----APRVVDSLSSLLDPLKIADQSVDLNLKLMKWRILPDLNLDIINKTKVLLGAGTLGCEVARLLMTWGVKLTIVVD

OsATG7 392 DGCVSMSDLVQOSLYTDKDCGVPRTAIVPHLKERCSAVEVEGTOMGIPKLEYNISASKISSITDDCKRLQTLVDSNDV  
ZmATG7 390 SGSVMSDLAKOSLYIDKDCGVPRTAIVPHLKERCPAVEVESIQLEIPMPGHPVSSSKMASVLDLCKLQTLVAANDAI  
AtATG7 389 YGKVAMSNPVROSLYNFEDC-----  
ScATG7 356 NCTVSYSNPVRQALYNFEDC-----

OsATG7 472 FLLNETWEGMWLPTLLCADKNKIATVLLGYDNYLVMRHGAGPGTKSGGMDEGIAQIENLSTQDALGRQLGCCFCSDTT  
ZmATG7 470 FLLTDTWESRWLPTLLCSSENKIATVLLGHDSYLVMRHGAGPGT-SGGTDE--VTTQKLSTENALGHQLGCCFCNDTA  
AtATG7 409 -----LG-----  
ScATG7 376 -----

OsATG7 552 SLVNSDHNAGLDQOSAVILPGLTSVASGKAVELFARMLHHPDEIRAPGDIAGTDEHQGLLPHQMGSLSKCVLSTVLC  
ZmATG7 547 SLIN-----PISYETLPLGLTSVASGKAVELFARMLHHPDEIRAPGDIAGTDEHQGLLPHQLRGSIPKCDLFLVELN  
AtATG7 411 -----  
ScATG7 376 -----

OsATG7 632 NSSSNCIACSNAVLSEYRRRGDFVFMQAITCPTYLKDLFGISDLKPKFASKISASIPVSKTSASIPVNLKELSSARCLLL  
ZmATG7 619 NSSVNTACSNAVLSEYRRRGDFVFMQAINYPAYLKDFTGISDSKRPDT-----CPKIPPNISVNSDKLSDVRCLLL  
AtATG7 411 -----  
ScATG7 376 -----

OsATG7 712 GAGTLGCDVARILMDCGVRKLTIVVDSGHHVVVSNLARQSLYTSDDRDSPKASAILGRLKERCPSVDAKGIKMEIPMPGHPV  
ZmATG7 691 GAGTLGCDVARILMDCGVRKLTIVVDSGHHVVVSNLARQSLYTSDDRDPAPKATLRLHLVERCPSVDAQGIKMEIPMPGHPV  
AtATG7 411 -----RGEFKAVAAVKSILKQIFPAMETSQVVMALPMPGHPV  
ScATG7 376 -----GPKKAEAAAALSKRIFPLMDATGVKLSIPMIHCKL

OsATG7 792 SPNEAVSVLEDCRKLQELVSSHDAVFLTDTRESRWLPTLLCANENKIATTAALGYDSYLVMRHGAGPGTNCSPDVVAA  
ZmATG7 771 SPGEAAGVLDCEERLKELVSHDAVFLTDTRESRWLPTLLCTNENKIATTAALGYDSYLVMRHGAGPGTSCSEASVVTATA  
AtATG7 447 SSQEEFVLDCEERLSELIESHDAVFLTDTRESRWLPTLLCANANKIATTAALGFDSYLVMRHGAGP-----TSLSD  
ScATG7 411 VNEEAQ--HKDFDLRALIKEHDIIFLLVDSRESRWLPTLLSNIENKTVINAALGFDSYLVMRHGN-----

OsATG7 872 ADTLSAEDVLRQRLGCFYFCDNVVAPVDSVSNRTLDQOCTVTRPGLSSITSGCAADLFRMLHHPDGIHAPG-----EIA  
ZmATG7 851 IDKMSTEDALGRQRLGCFYFCDNVVAPVDSVSNRTLDQOCTVTRPGLASIASGRAADLFRMLHHPDGIHAPG-----EIA  
AtATG7 521 MQNLIDINKTN-TORLGCYFCDNVVAPVDSVSNRTLDQOCTVTRPGLAPIAGALAVELLVGVLOHPLGINAKGDNSLSNT  
ScATG7 475 -----RDEQSSKQLGCFYFCDNVVAPVDSVSNRTLDQOCTVTRPGLVAMMASSLAVELMVTSLLOT-----KYS

OsATG7 947 GTSSEGPLGLLPHQIRGSLSQYNLLTLLGYSSSNCTACSNAVLSEYHRRGMDFVMQVINEPTYLEDLTGLTDLMKSAAYS  
ZmATG7 926 GTGSGHEHGLLPHQIRGSLSQYNLLTLLGYSSSNCTACSHAVLYQYRRGMDFVMQVINEPTYLEDLTGLTELKMSASCS  
AtATG7 600 GNDDSPGLGLLPHQIRGSLSQYFSQITLLGQASNSCTACSETVISEYRERGNSEFILEAINHPTYLEDLTGLTELKKAANSF  
ScATG7 536 G-SETTVLGDIPHQIRGFLHNFSLIKLETPAYEHCAPACPKVLEAFTDLGWEFVKKALEHPLYLEEISGLSVIKQEVERL

OsATG7 1027 QVEWIDEVDDDDDEMDI--  
ZmATG7 1006 QVEWVDEIDDDDFVEV--  
AtATG7 680 NLDWEDDDTDDDDVAVDL  
ScATG7 615 GNDVFEWEDDESDEIA--

```

OsATG10a 1 MGGSTTVRDGTLSHGDFVASAKALIEKWKIEIDVDDALPDWRWKPC--KMGVPSEEEGYLALEGVYRNHGGSQ-----
ZmATG10 1 MGGSP-VWDGTLSPDSFNLSAAALVKRWKEIEVDDSLPEWTWKPCS--KLGVPSEVEGYLALERVYRSCGTSQEQIEEMK
AtATG10 1 MDSAREVSDGRLTVEGFVSVASRAAFADKWKIHN--QSFPPWSWVPLINRTLVSKKKEEGYLSLEKIIILSSLEEEIPEDES
ScATG10 1 -----MIPYQEWHSQLOSLVYDSQIFHN-----WALCQ--DVHLNDEKDGLLLRLLIPTRQLQKNT-----

OsATG10a 72 -----VQSCSNLHFYDYHVYVYSFSYKVPVLYFQGHOSGGQLLTLEIKEDLPSLSLKLLESRWT
ZmATG10 78 FDGAGDVA-----WVESSDNVHVYDFHAVYSFSYKVPVLYFRGYHTSGQLLTLEDEVKEGLPSHSQKVLSESKWT
AtATG10 79 LNVATDCLKEKETVDHTILVPTMENEAHYYDFHIVYSFSYKVPVLYFRGYCSGGEPLALDVIKKDVPSCSVSLLLESKWT
ScATG10 53 -----ERIENKLLNHIELYLYSKVYNEPLLLLRIWEEKS-IDGIPMTKLMLEPTDIESLLDVQGF

OsATG10a 133 FITREEHPHS-RPWFTLHPCGTSDCMKLLLEG--MODKDQ-QVRYLPAWLTIVGQAVGLKIPLGLHCNS
ZmATG10 148 FITQEEHPHS-KPWLALHPCATSGWMKLLLEETEATDKEH-SVQYLPAWLSVVGQAVGLKIPLGLHSNS
AtATG10 159 FITQEEHPVLN-RPWFKLHPCGTEEDWIKLLSQSSSSSGCMPIVLYLVSWFSVVGQVVGRLRIPLMLN--
ScATG10 113 QLGLDTIINLEGSVWYSFHPCDTSCIVG-----DQAEFMSTYLRRWVVSIF-----IFSWLGYEDS-

```

AtATG12a 1 -----  
AtATG12b 1 -----  
ZmATG12 1 -----  
OsATG12 1 -----  
ScATG12 1 MSRILESENETESDESSIISTNNGTAMERSRNNQELRSSPHTVQNRLELFSRRLSQLGLASDISVDQQVEDSSSGTYEQE

AtATG12a 1 -----MATESSSPSSVRKVVVHLRATGGAPILKQSKFKIPGTDKFAKVIDFLRRQLHSDSLFVYVNSAFSPNPDE  
AtATG12b 1 -----MATE--SPNSVOKIVVHLRATGGAPILKQSKFKVSGSDKFAVVIDFLRRQLHSDSLFVYVNSAFSPNPDE  
ZmATG12 1 -----MAAE-----ADQKVVVHVVRSTGDAPILKQSKFKISGRDKFKVIEFLRRQLHQDTLFVYVNSAFSPNPDE  
OsATG12 1 -----MAAV---AAEQKVVVHFRSTGNAPQLKQSKFKIGNEKFLKIIDFLRRQIHQDTVFIYVNSAFSPNPDE  
ScATG12 81 ETIKTNAQTSKQKSHKDEKNIQKIQIKFQPIGSGIGQLKPSVCKISMSQSFAFVILELKRRLKMDHVCYLNNSFAPSPQO

AtATG12a 71 SVIDLYNNEFGDGKLVVNYACSMWAG  
AtATG12b 69 SVIDLYNNEFGDGKLVVNYACSMWAG  
ZmATG12 66 LVIDLYNNEFGIDGKLVVNYALSAAWAG  
OsATG12 68 LIIDLYNNEFGIDGQLVVNYASSWAG  
ScATG12 161 NIGELWMOEKTNDELIVSYCASVAFG
