# Supplementary material
Source: PubMed Central journal article supplement (PMC2613746)
Supplement: pp.108.126714_2.pdf [file pp.108.126714_2.pdf]

**Table S1. Genbank Accession Numbers Associated with Splice Variants (SVs) of Selected *Arabidopsis* (At), Rice (Os) and Maize (Zm) Atg Genes**

|    |              | # a.a.   | Genbank Accession (or TC number in ZmGI)            |
|----|--------------|----------|-----------------------------------------------------|
| At | <i>ATG3</i>  | 313      | NM_125543                                           |
| Os | <i>Atg3a</i> | SV1 314  | AK067737                                            |
|    |              | SV2 213? | CB682487                                            |
|    |              | SV3 54   | CT845874                                            |
| Os | <i>Atg3b</i> | SV1 54   | AK241567                                            |
|    |              | SV2 213  | CB680869, CB680870, CA757837                        |
| Zm | <i>Atg3</i>  | SV1 311  | TC316720 (also cloned in this study)                |
|    |              | SV2 132  | (novel; from this study)                            |
| At | <i>ATG4a</i> | SV1 467  | NM_180081                                           |
|    |              | SV2 422  | NM_201958                                           |
| At | <i>ATG4b</i> | SV1 477  | NM_115858                                           |
|    |              | SV2 360  | NM_180391                                           |
|    |              | SV3 267  | NM_001125387                                        |
| Os | <i>Atg4a</i> | SV1 474  | AK242832                                            |
|    |              | SV2 37   | CI309130, CI302592                                  |
| Os | <i>Atg4b</i> | 478      | AK069012                                            |
| Zm | <i>Atg4a</i> | SV1 492  | TC324693 (also cloned in this study)                |
|    |              | SV2 429  | (novel; from this study)                            |
| Zm | <i>Atg4b</i> | SV1 492  | EC903166, EC892792, etc (also cloned in this study) |
|    |              | SV2 462  | TC336458                                            |
|    |              | SV3 178  | (novel; from this study)                            |
|    |              | SV4 208  | (novel; from this study)                            |
|    |              | SV5 292  | (novel; from this study)                            |
|    |              | SV6 271  | (novel; from this study)                            |
| At | <i>ATG5</i>  | 337      | NM_121735                                           |
| Os | <i>Atg5</i>  | SV1 380  | AK063557                                            |
|    |              | SV2 231  | CI122850                                            |

|                 |     |      |                                                     |
|-----------------|-----|------|-----------------------------------------------------|
| Zm <i>Atg5</i>  | SV1 | 374  | TC337283                                            |
|                 | SV2 | 157  | DR813916                                            |
| At <i>ATG7</i>  |     | 697  | NM_123958                                           |
| Os <i>Atg7</i>  | SV1 | 1042 | AK067422                                            |
|                 | SV2 | 502? | CB673026                                            |
|                 | SV3 | 594  | CB647683                                            |
|                 | SV4 | 385  | CB628914                                            |
|                 | SV5 | 184? | CI615822                                            |
| Zm <i>Atg7</i>  |     | 1021 | EC871141, CF020538, etc (also cloned in this study) |
| At <i>ATG8a</i> | SV1 | 122  | NM_118319                                           |
|                 | SV2 | 137  | NM_001084955                                        |
| At <i>ATG8b</i> | SV1 | 122  | NM_178967                                           |
|                 | SV2 | 122  | NM_116700                                           |
| At <i>ATG8c</i> |     | 119  | NM_104884                                           |
| At <i>ATG8d</i> |     | 120  | NM_126586                                           |
| At <i>ATG8e</i> | SV1 | 122  | NM_130080                                           |
|                 | SV2 | 122  | NM_180100                                           |
| At <i>ATG8f</i> | SV1 | 121  | NM_117751                                           |
|                 | SV2 | 121  | NM_179064                                           |
| At <i>ATG8g</i> |     | 121  | NM_115928                                           |
| At <i>ATG8h</i> |     | 119  | NM_111517                                           |
| At <i>ATG8i</i> |     | 115  | NM_112426                                           |
| Os <i>Atg8a</i> | SV1 | 119  | AK059939                                            |
|                 | SV2 | 49   | CT830394                                            |
| Os <i>Atg8b</i> | SV1 | 119  | AK121268                                            |
|                 | SV2 | 119  | CU302213                                            |
|                 | SV3 | 119  | CT862705                                            |
|                 | SV4 | 49   | CT833979                                            |
| Os <i>Atg8c</i> | SV1 | 120  | AK121169, AK062573                                  |
|                 | SV2 | 47   | CB679970, CB679971                                  |

|                  |     |      |                                                          |
|------------------|-----|------|----------------------------------------------------------|
|                  | SV3 | ?    | CX110709                                                 |
| Os <i>Atg8d</i>  | SV1 | 118  | CI298209, CF992091, CI034410, EE591899, etc              |
|                  | SV2 | 83   | CB638721, CB638720, CB639070, CF318002, etc              |
|                  | SV3 | 12   | CI747130                                                 |
| Os <i>Atg8e</i>  |     | 107? | No supporting nucleotide sequence                        |
| Zm <i>Atg8a</i>  | SV1 | 119  | AY104735, DQ245523 (TC329822; also cloned in this study) |
|                  | SV2 | 49   | CB350601, BM349572, BM348395, BM349643 (TC334011)        |
| Zm <i>Atg8b</i>  | SV1 | 120  | DQ244834, etc (TC326171; also cloned in this study)      |
|                  | SV2 | 120  | (TC330425)                                               |
|                  | SV3 | 13?  | CD997790                                                 |
|                  | SV4 | 50?  | BG842180 (TC369950)                                      |
| Zm <i>Atg8c</i>  | SV1 | 120  | (TC352053; also cloned in this study)                    |
|                  | SV2 | 32   | EB707920                                                 |
|                  | SV3 | 62?  | BG320992 (TC357721)                                      |
| Zm <i>Atg8d</i>  | SV1 | 119  | CO466368, etc (TC337655; also cloned in this study)      |
|                  | SV2 | 92?  | AW566172, AW520240 (TC352873)                            |
|                  | SV3 | 57   | EB404907, EB404908, EB404837, EB404838                   |
|                  | SV4 | 57   | DW531152 (also cloned in this study)                     |
| Zm <i>Atg8e</i>  | SV1 | 119  | AY103879 (TC330328; also cloned in this study)           |
|                  | SV2 | 150  | DR790662 (TC325503)                                      |
|                  | SV3 | 57   | (TC341957)                                               |
| At <i>ATG10</i>  | SV1 | 225  | NM_180201                                                |
|                  | SV2 | 226  | NM_180202                                                |
| Os <i>Atg10a</i> |     | 198  | AK241831                                                 |
| Os <i>Atg10b</i> | SV1 | 110  | AK099684                                                 |
|                  | SV2 | 218? | CK014623                                                 |
| Zm <i>Atg10</i>  | SV1 | 215  | BT016613; (TC320991); (also cloned in this study)        |
|                  | SV2 | 213? | DV028326                                                 |
|                  | SV3 | 128  | DY533231, DY533232                                       |
|                  | SV4 | 128  | DV504020                                                 |

|    |               |     |                          |                                                     |
|----|---------------|-----|--------------------------|-----------------------------------------------------|
|    | SV5           | 101 | (novel; from this study) |                                                     |
|    | SV6           | 101 | (novel; from this study) |                                                     |
| At | <i>ATG12a</i> | 96  | NM_104299                |                                                     |
| At | <i>ATG12b</i> | 94  | NM_112251                |                                                     |
| Os | <i>Atg12</i>  | SV1 | 93                       | AK243073                                            |
|    |               | SV2 | 109                      | CI356061                                            |
| Zm | <i>Atg12</i>  | SV1 | 91                       | AY104799, AW056117, etc (also cloned in this study) |
|    |               | SV2 | 54                       | BG841308, EE041696 (also cloned in this study)      |
|    |               | SV3 | 75                       | EC902256                                            |
|    |               | SV4 | 86                       | CD966598, CD947458                                  |
|    |               | SV5 | ?                        | AW052989                                            |

---

**Table SII. Oligonucleotide Primers used in This Study**

| Primer ID   | Sequence (5' to 3')          | <sup>a</sup> Usage |
|-------------|------------------------------|--------------------|
| ZmATG3a_F8  | caccatgcagggaagcagaaggtctac  | FL                 |
| ZmATG3a_R3  | cttcaagccaaccaataatcagct     | FL, RT             |
| ZmATG3a_F1  | gtatctccccccaataagcagttcct   | RT                 |
| ZmATG4a_F1  | caccatgacgagctgcctgagagggga  | FL, RT             |
| ZmATG4a_R2  | aacatgtcttagcctcgtctaaag     | FL, RT             |
| ZmATG4b_F1  | caccatgacgacctgcctgagagggga  | FL, RT             |
| ZmATG4b_R2  | catcgggtgtcccctggttagag      | FL, RT             |
| ZmATG5a_F5  | gtgcagatccagaaagaccatgga     | RT                 |
| ZmATG5a_R7  | tctctattgtttctagtgccgac      | RT                 |
| ZmATG7a_F1  | caccatggcgggtgccggtgcatgggc  | FL                 |
| ZmATG7a_F3  | ccaggcgatactgctggtacagaa     | RT                 |
| ZmATG7a_R2  | atatcagacctcgacgaaatcgtc     | FL, RT             |
| ZmATG8a_F1  | caccatggccaggacctttcaaaatg   | FL, RT             |
| ZmATG8a_R2  | acagtggcaggggcgattgctcta     | FL, RT             |
| ZmATG8bc_F1 | caccatggccaagacgagctcgttcaag | FL, RT             |
| ZmATG8b_R2  | gggcaaggcgacccccattgctggc    | FL, RT             |
| ZmATG8c_R2  | aaggcagacccgattgtggtgagc     | FL, RT             |
| ZmATG8d_F1  | caccatggcgaggagttcgttcaagttg | FL, RT             |
| ZmATG8d_R2  | ccaatgtggatccatagcggctcc     | FL, RT             |
| ZmATG8e_F1  | caccatggcgaggagctcgttcaagctg | FL, RT             |
| ZmATG8e_R2  | tacaggaggaggggcatgtccga      | FL, RT             |
| ZmATG10_F4  | caccatgggaggctcccctgtatgggac | FL, RT             |
| ZmATG10_R2  | gcaaggtctagccaccagtgcacaaa   | FL, RT             |
| ZmATG12_F1  | caccatggccgaggaggcagatcagaaa | FL, RT             |
| ZmATG12_R2  | tgctgcaagacagacttagcccca     | FL, RT             |
| ZmLHCb5_F1  | atggcggctcttctccatccaag      | RT                 |
| ZmLHCb5_R2  | gtaaaatcaaggacggcagcagcg     | RT                 |
| ZmGAPDH_F   | ttcagggtggtgccaagaaggttg     | RT                 |

---

|             |                          |    |
|-------------|--------------------------|----|
| ZmGAPDH_R   | ctgtagccccactcgttgcgtacc | RT |
| ZmSBPase_F3 | attgtcgacaccaacttcaccgtc | RT |
| ZmSBPase_R2 | cgagcccggattctagtaattcag | RT |
| ZmSEE1a_F3  | ctccaccaatcggaaggcctctc  | RT |
| ZmSEE1a_R4  | cggtaactccttccttcatgat   | RT |
| ZmUBC_F2    | acgaaggtcttccatccaaacatc | RT |
| ZmUBC_R2    | gtttcatgggcaacaccacaatcg | RT |

---

<sup>a</sup> Abbreviations: FL, for cloning a full-length cDNA; RT, for RT-PCR
